# Supplementary material for: Growth of Deciduous and Evergreen Species in Two Contrasting Temperate Forest Stands in Korea: An Intersite Experiment
Source: MDPI journal article supplement (doi:10.3390/plants11070841), 2022-03-22
Supplement: s1 [file s1]

## Supplementary Materials

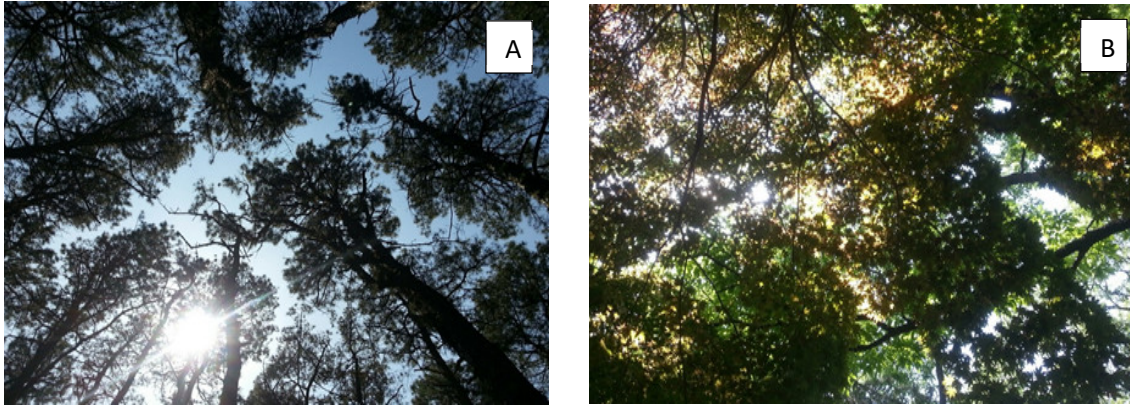

**Figure S1.** Crown structure of (A) pine stand and (B) oak stand.

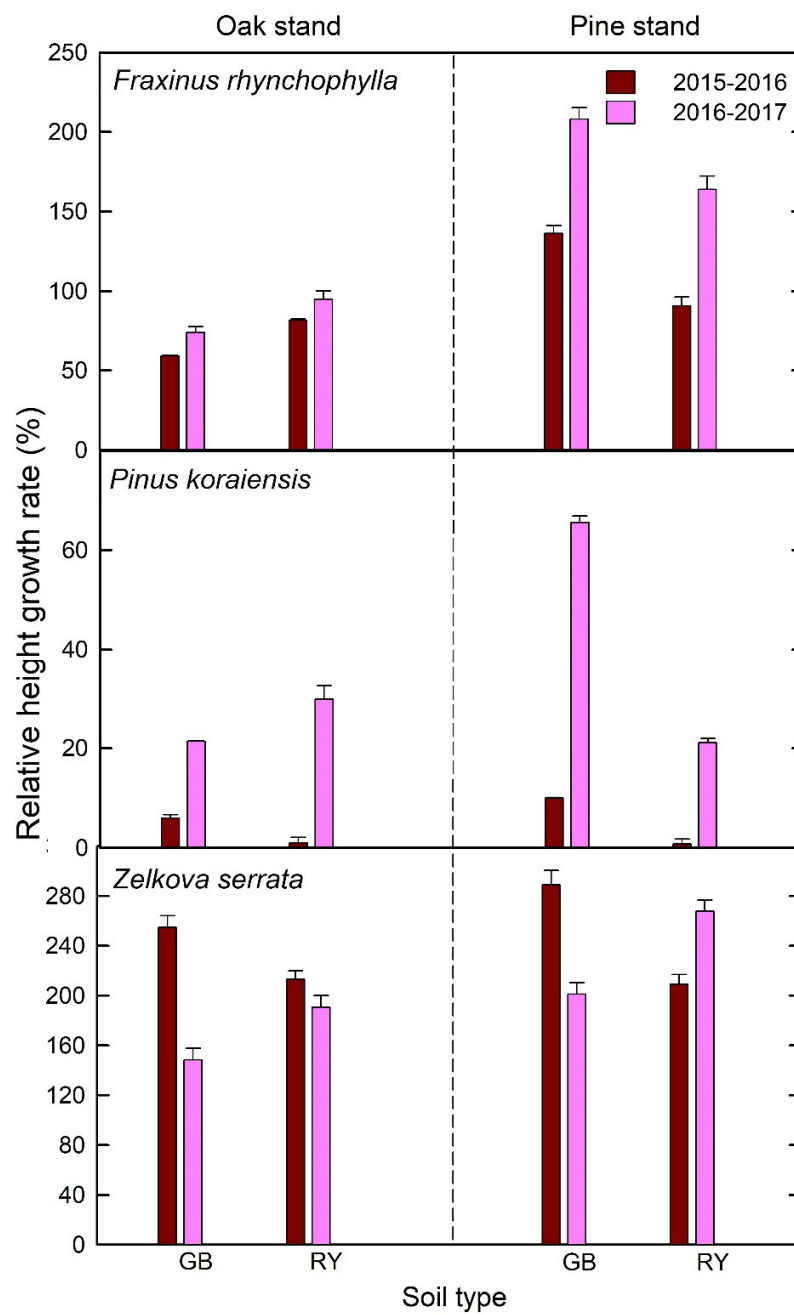

**Figure S2.** Relative height growth rate of *Fraxinus rhynchophylla*, *Pinus koraiensis*, and *Zelkova serrata* in different soil and forest stands from 2015 to 2017.

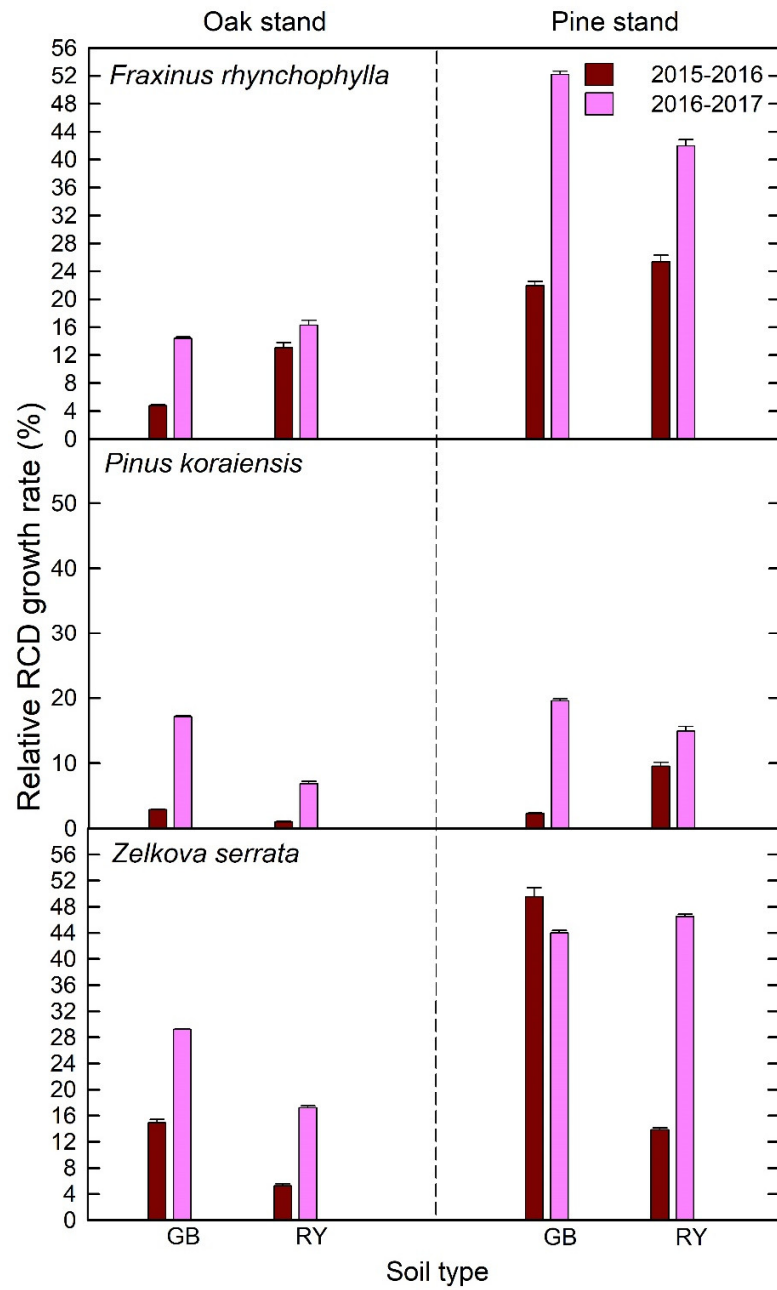

**Figure S3.** Relative root collar diameter growth of *Fraxinus rhynchophylla*, *Pinus koraiensis*, and *Zelkova serrata* in different soil and forest stands from 2016 to 2017.

**Table S1.** P values estimated by two-way analysis of variance (ANOVA) for soil physical and chemical properties across soil horizons and stands.

| Source of variables  | <u>Sand</u> |                  | <u>Silt</u> |                  | <u>Clay</u> |              | <u>OM</u> |                  | <u>pH</u> |                  | <u>Total N</u> |                  |
|----------------------|-------------|------------------|-------------|------------------|-------------|--------------|-----------|------------------|-----------|------------------|----------------|------------------|
|                      | F value     | Pr > F           | F value     | Pr > F           | F value     | Pr > F       | F value   | Pr > F           | F value   | Pr > F           | F value        | Pr > F           |
| Stand                | 52.45       | <b>&lt;0.001</b> | 34.90       | <b>&lt;0.001</b> | 23.58       | <b>0.001</b> | 51.62     | <b>&lt;0.001</b> | 41.81     | <b>&lt;0.001</b> | 18.12          | <b>0.003</b>     |
| Soil horizon         | 0.02        | 0.895            | 0.73        | 0.417            | 1.44        | 0.265        | 68.53     | <b>&lt;0.001</b> | 1.16      | 0.313            | 82.29          | <b>&lt;0.001</b> |
| Stand × Soil horizon | 3.16        | 0.114            | 1.39        | 0.273            | 2.29        | 0.169        | 4.17      | 0.075            | 0.13      | 0.729            | 0.00           | 0.985            |

  

| Source of variables  | <u>Available P</u> |              | <u>Exchangeable K<sup>+</sup></u> |                  | <u>Exchangeable Ca<sup>2+</sup></u> |        | <u>Exchangeable Mg<sup>2+</sup></u> |                  | <u>Exchangeable Na<sup>+</sup></u> |        | <u>CEC</u> |                  |
|----------------------|--------------------|--------------|-----------------------------------|------------------|-------------------------------------|--------|-------------------------------------|------------------|------------------------------------|--------|------------|------------------|
|                      | F value            | Pr > F       | F value                           | Pr > F           | F value                             | Pr > F | F value                             | Pr > F           | F value                            | Pr > F | F value    | Pr > F           |
| Stand                | 0.98               | 0.352        | 62.30                             | <b>&lt;0.001</b> | 4.78                                | 0.060  | 74.01                               | <b>&lt;0.001</b> | 0.13                               | 0.733  | 34.23      | <b>&lt;0.001</b> |
| Soil horizon         | 16.74              | <b>0.004</b> | 10.56                             | <b>0.012</b>     | 2.34                                | 0.165  | 15.41                               | <b>0.004</b>     | 1.13                               | 0.320  | 7.95       | <b>0.024</b>     |
| Stand × Soil horizon | 0.18               | 0.683        | 8.65                              | <b>0.019</b>     | 0.02                                | 0.889  | 4.42                                | 0.069            | 3.13                               | 0.115  | 1.50       | 0.256            |

**Table S2.** P values estimated by two-way repeated measures analysis of variance (ANOVA) for height growth and RCD growth of three species at harvesting year across soil horizons and stands.

| Species                       | Source              | <u>Height growth</u> |                  | <u>RCD growth</u> |                  |
|-------------------------------|---------------------|----------------------|------------------|-------------------|------------------|
|                               |                     | F Value              | Pr>F             | F Value           | Pr>F             |
| <i>Fraxinus rhynchophylla</i> | Time                | 104.48               | <b>&lt;0.001</b> | 177.95            | <b>&lt;0.001</b> |
|                               | Stand               | 20.65                | <b>&lt;0.001</b> | 70.99             | <b>&lt;0.001</b> |
|                               | Time × stand        | 9.29                 | <b>0.001</b>     | 42.67             | <b>&lt;0.001</b> |
|                               | Soil                | 0.55                 | 0.466            | 0.01              | 0.935            |
|                               | Time × soil         | 0.16                 | 0.851            | 0.59              | 0.555            |
|                               | Stand × soil        | 2.69                 | 0.112            | 2.55              | 0.122            |
|                               | Time × Stand × soil | 1.59                 | 0.213            | 1.30              | 0.280            |
| <i>Pinus koraiensis</i>       | Time                | 12.45                | <b>&lt;0.001</b> | 27.80             | <b>&lt;0.001</b> |
|                               | Stand               | 0.11                 | 0.747            | 5.93              | 0.035            |
|                               | Time × stand        | 0.98                 | 0.381            | 1.49              | 0.250            |
|                               | Soil                | 0.01                 | 0.936            | 0.26              | 0.621            |
|                               | Time × soil         | 1.44                 | 0.263            | 0.87              | 0.433            |
|                               | Stand × soil        | 2.28                 | 0.162            | 3.18              | 0.105            |
|                               | Time × Stand × soil | 1.60                 | 0.230            | 0.58              | 0.572            |
| <i>Zelkova serrata</i>        | Time                | 132.56               | <b>&lt;0.001</b> | 60.67             | <b>&lt;0.001</b> |
|                               | Stand               | 10.23                | <b>0.008</b>     | 25.42             | <b>&lt;0.004</b> |
|                               | Time × stand        | 1.53                 | 0.239            | 9.72              | <b>&lt;0.001</b> |
|                               | Soil                | 6.35                 | <b>0.029</b>     | 11.17             | <b>0.007</b>     |
|                               | Time × soil         | 0.53                 | 0.591            | 4.34              | <b>0.026</b>     |
|                               | Stand × soil        | 3.21                 | 0.101            | 5.60              | <b>0.037</b>     |
|                               | Time × Stand × soil | 0.22                 | 0.807            | 0.67              | 0.521            |

**Table S3.** P values estimated by two-way analysis of variance (ANOVA) for biomass growth of three species across soil properties and stands.

| Species              | Source of variables | Leaf             | Stem             | Fine<br>root     | Coarse<br>root   | Total<br>biomass | Root to<br>shoot ratio |
|----------------------|---------------------|------------------|------------------|------------------|------------------|------------------|------------------------|
| <i>Fraxinus</i>      | Stand               | <b>&lt;0.001</b> | <b>&lt;0.001</b> | <b>&lt;0.001</b> | <b>&lt;0.001</b> | <b>&lt;0.001</b> | <b>&lt;0.001</b>       |
| <i>rhynchophylla</i> | Soil type           | 0.741            | 0.618            | 0.197            | 0.626            | 0.420            | 0.209                  |
|                      | Stand × Soil type   | 0.209            | 0.249            | 0.133            | 0.228            | 0.175            | 0.935                  |
| <i>Pinus</i>         | Stand               | 0.086            | 0.058            | 0.319            | <b>0.042</b>     | 0.295            | <b>0.001</b>           |
| <i>koraiensis</i>    | Soil type           | 0.423            | 0.451            | 0.666            | 0.341            | 0.625            | 0.086                  |
|                      | Stand × Soil type   | 0.364            | 0.269            | 0.586            | 0.228            | 0.237            | 0.116                  |
| <i>Zelkova</i>       | Stand               | 0.125            | <b>0.009</b>     | <b>0.005</b>     | <b>&lt;0.001</b> | <b>0.005</b>     | <b>0.018</b>           |
| <i>serrata</i>       | Soil type           | 0.093            | <b>0.025</b>     | <b>0.029</b>     | 0.302            | <b>0.032</b>     | <b>0.042</b>           |
|                      | Stand × Soil type   | 0.155            | <b>0.041</b>     | <b>0.028</b>     | 0.124            | <b>0.041</b>     | 0.494                  |
